# Supplementary material for: Reconstruction of gene regulatory networks reveals chromatin remodelers and key transcription factors in tumorigenesis
Source: PubMed Central journal article supplement (PMC4872343; doi:10.1186/s13073-016-0310-3), 2016-05-19
Supplement: 13073_2016_310_MOESM4_ESM.pdf [file 13073_2016_310_MOESM4_ESM.pdf]

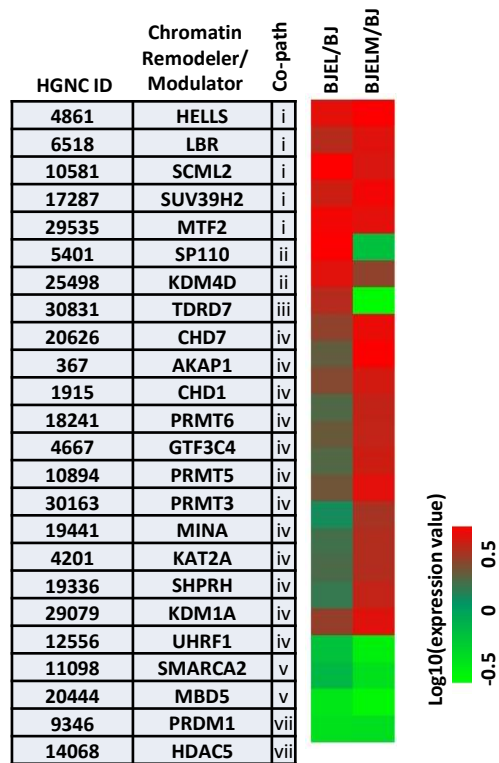

**Figure S4. Gene expression levels of Chromatin Remodelers/Modulators (CRM) differentially expressed in the stepwise tumorigenesis system.** CRMs are specified on the left together with the corresponding co-expression paths. The heatmap shows the ratio of expression in BJEL or BJELM relatively to the expression in BJ. The corresponding color code is shown on the right.
