# Supplementary material for: Reconstruction of gene regulatory networks reveals chromatin remodelers and key transcription factors in tumorigenesis
Source: PubMed Central journal article supplement (PMC4872343; doi:10.1186/s13073-016-0310-3), 2016-05-19
Supplement: 13073_2016_310_MOESM5_ESM.pdf [file 13073_2016_310_MOESM5_ESM.pdf]

**Supplementary Table S1. Chromatin Remodelers/Modulators differentially expressed during cell transformation.** The Table describes their reported function and involvement in cancer, and provides the corresponding references. Abbreviations: TDRD – Tudor domain, HMT – histone methyltransferase, BRD – bromodomain, CHD – chromodomain, HAT – histone acetyltransferases. Supplementary data references are in the Additional file 6 of this manuscript.

| CRM (Alternative symbol)   NCBI gene ID   gene name |       |                                                          | co-path | CR class  | Functional group / Function                                                                                                          | Involvement in cancer                                                                                                                                                |
|-----------------------------------------------------|-------|----------------------------------------------------------|---------|-----------|--------------------------------------------------------------------------------------------------------------------------------------|----------------------------------------------------------------------------------------------------------------------------------------------------------------------|
| <i>HELLS</i><br>( <i>LSH</i> )                      | 3070  | helicase, lymphoid-specific                              | i       | remodeler | SNF2-like protein/ transcriptional repressor <sup>1,2,3</sup>                                                                        | Overexpressed in prostate cancer; drives retinoblastoma tumor progression <sup>4,5</sup>                                                                             |
| <i>LBR</i>                                          | 3930  | lamin B receptor                                         | i       | reader    | TDRD containing protein/ bind H4K20me2/<br>Represses transcription <sup>6</sup>                                                      | Unknown                                                                                                                                                              |
| <i>SCML2</i>                                        | 10389 | sex comb on midleg-like 2                                | i       | -         | Polycomb group (PcG) gene, part of PRC1 complex/<br>binds and modulates CDK/CYCLIN/p21 complexes <sup>7</sup>                        | Overexpressed in AML patients <sup>8,9</sup>                                                                                                                         |
| <i>SUV39H2</i><br>( <i>KMT1B</i> )                  | 79723 | suppressor of variegation 3-9 homolog<br>2 (Drosophila)  | i       | writer    | HMT/ Trimethylates 'Lys-9' of histone H3/ maintains<br>heterochromatin, ensures genome stability <sup>10,11</sup>                    | Overexpressed in human lung, bladder cancers, multiple<br>myeloma; suggested as a novel target of anticancer therapy <sup>12</sup>                                   |
| <i>MTF2</i><br>( <i>PCL2</i> )                      | 22823 | metal response element binding<br>transcription factor 2 | i       | -         | PcG gene, associates with the PRC2 complex and<br>promotes H3K27me3 at target genes <sup>13</sup>                                    | Unknown                                                                                                                                                              |
| <i>SP110</i><br>( <i>IFI45</i> )                    | 3431  | SP110 nuclear body protein                               | ii      | reader    | BRD containing protein, known to recognize acetyl-<br>lysine residues/ potentially involved in chromatin<br>remodeling <sup>14</sup> | Unknown                                                                                                                                                              |
| <i>KDM4D</i><br>( <i>JMJD2D</i> )                   | 55693 | lysine (K)-specific demethylase 4D                       | ii      | eraser    | Histone demethylase/ demethylase both H3K9me2 and<br>H3K9me3 <sup>15</sup>                                                           | Both pro-oncogenic function and activation of p53-dependent<br>gene expression are reported <sup>16</sup>                                                            |
| <i>TDRD7</i>                                        | 23424 | tudor domain containing 7                                | iii     | reader    | TDRD containing protein/ preferentially binds<br>H3K9me2/3 <sup>17</sup>                                                             | Unknown                                                                                                                                                              |
| <i>CHD7</i>                                         | 55636 | chromodomain helicase DNA binding<br>protein 7           | iv      | reader    | CHD enzyme of SNF2 family/ bind to methylated H3K4/<br>positive regulator of rRNA biogenesis <sup>18,19</sup>                        | Dysregulated in 13-35% of pancreatic adenocarcinoma; low<br>CHD7 expression predicts higher survival outcomes in patients<br>with pancreatic cancer <sup>20,21</sup> |
| <i>AKAP1</i><br>( <i>TDRD17</i> )                   | 8165  | A kinase (PRKA) anchor protein 1                         | iv      | reader    | Protein, containing TDRD, known to bind di- and<br>trimethylated lysine and dimethylated arginine <sup>22</sup>                      | Unknown                                                                                                                                                              |
| <i>CHD1</i>                                         | 1105  | chromodomain helicase DNA binding<br>protein 1           | iv      | reader    | CHD, containing protein/ Bind trimethylated lysine with<br>sequence specificity via tandem chromodomain <sup>23</sup>                | Tumor suppressor required for ERG rearrangement in prostate<br>cancer <sup>24</sup>                                                                                  |
| <i>PRMT6</i>                                        | 55170 | protein arginine methyltransferase 6                     | iv      | writer    | Methyltransferase/ Generates monomethylarginine and<br>asymmetric dimethylarginine <sup>25,26</sup>                                  | Knockdown of PRMT6 in osteosarcoma cells led to the up-<br>regulation of THBS1, natural inhibitor of angiogenesis and cell<br>migration <sup>27</sup>                |

| CRM (Alternative symbol)   NCBI gene ID   gene name |        | co-path                                                                   | CR class | Functional group / Function | Involvement in cancer                                                                                           |                                                                                                                                                                                   |
|-----------------------------------------------------|--------|---------------------------------------------------------------------------|----------|-----------------------------|-----------------------------------------------------------------------------------------------------------------|-----------------------------------------------------------------------------------------------------------------------------------------------------------------------------------|
| <i>GTF3C4</i><br>( <i>KAT12</i> )                   | 9329   | general transcription factor IIIC, polypeptide 4, 90kDa                   | iv       | writer                      | HAT/ has substrate specificity for H3 <sup>28</sup>                                                             | Unknown                                                                                                                                                                           |
| <i>PRMT5</i>                                        | 10419  | protein arginine methyltransferase 5                                      | iv       | writer                      | Generates mono- and dimethylarginin, dimethylates histones H3 and H4 and nonchromatin proteins <sup>29,30</sup> | Overexpressed in ovarian cancer and glioblastoma, candidate therapeutic target in glioblastoma <sup>31,32</sup>                                                                   |
| <i>PRMT3</i>                                        | 10196  | protein arginine methyltransferase 3                                      | iv       | writer                      | Generates monomethylarginine and asymmetric dimethylarginine <sup>33</sup>                                      | Unknown                                                                                                                                                                           |
| <i>MINA</i><br>( <i>MDIG</i> )                      | 84864  | MYC induced nuclear antigen                                               | iv       | eraser                      | Histone demethylase/ demethylase of H3K9me3 <sup>34,35</sup>                                                    | Overexpressed in colon cancer, associated with lung cancer, potential prognostic factor for esophageal squamous cell carcinoma; marker of adenocarcinoma <sup>36-39</sup>         |
| <i>KAT2A</i><br>( <i>GCN5</i> )                     | 2648   | K(Lysine) acetyltransferase 2A                                            | iv       | writer                      | HAT/ belongs to SAGA and ATAC complexes <sup>40,41</sup>                                                        | Promote transcription of TNFRSF10A/10B in lung cancer cells <sup>42</sup>                                                                                                         |
| <i>SHPRH</i>                                        | 257218 | SNF2 histone linker PHD RING helicase                                     | iv       | reader?                     | PhD containing protein, but doesn't recognize H3K4/ Poly-Ubiquitinate PCNA <sup>43</sup>                        | Possible candidate for the tumor suppressor gene <sup>44</sup>                                                                                                                    |
| <i>KDM1A</i><br>( <i>KDM1A</i> )                    | 23028  | lysine (K)-specific demethylase 1                                         | iv       | eraser                      | HMT/ Demethylate both H3K4me1/me2 and H3K9me1/me2, thus acting as coactivator or a corepressor <sup>45,46</sup> | Overexpressed in bladder, colorectal, gastric, lung, ER-negative breast cancers, chondrosarcoma, osteosarcoma <sup>47-49</sup>                                                    |
| <i>UHRF1</i>                                        | 29128  | ubiquitin-like with PHD and RING finger domains 1                         | iv       | reader                      | TDRD and PHD containing protein/ Binds to H3K9me3 and unmodified H3 <sup>50,51</sup>                            | Drive retinoblastoma tumor progression; upregulated and associated with cellular proliferation on colorectal cancer; overexpressed in hepatocellular carcinoma <sup>5,52,53</sup> |
| <i>SMARCA2</i><br>( <i>HBRM</i> )                   | 6595   | SWI/SNF related, matrix associated, actin dep-t regulator of chromatin A2 | v        | reader                      | BRD containing protein/ stabilize the interaction between DNA and histones <sup>54</sup>                        | Loss of SMARCA2 confer a proliferative advantage in prostate cancer <sup>55</sup>                                                                                                 |
| <i>MBD5</i>                                         | 55777  | methyl-CpG binding domain protein 5                                       | v        | reader                      | Binds to heterochromatin, but does not interact with methylated or unmethylated DNA <sup>56</sup>               | Unknown                                                                                                                                                                           |
| <i>PRDM1</i>                                        | 639    | positive regulatory domain-containing protein 1                           | vii      | writer                      | Methyltransferase/ potential nucleator for H3K27me3 accumulation and spread <sup>22,57</sup>                    | Tumor suppressor in diffuse large B-cell lymphomas, in aggressive natural killer cell lymphomas and anaplastic large-cell lymphoma <sup>58-60</sup>                               |
| <i>HDAC5</i>                                        | 10014  | histone deacetylase 5                                                     | vii      | eraser                      | Deacetylase/ required for maintenance of pericentric heterochromatin and long telomeres <sup>61,62</sup>        | Downregulated in glioblastoma <sup>63</sup>                                                                                                                                       |
