# Supplementary material for: Reconstruction of gene regulatory networks reveals chromatin remodelers and key transcription factors in tumorigenesis
Source: PubMed Central journal article supplement (PMC4872343; doi:10.1186/s13073-016-0310-3), 2016-05-19
Supplement: 13073_2016_310_MOESM7_ESM.pdf [file 13073_2016_310_MOESM7_ESM.pdf]

**Supplementary Table S2. TFs, preferentially associated with specific co-expression paths**, that originate from deregulated gene programming during tumorigenesis. Some of these TFs are differentially expressed as well, and the co-expression path they belong to is precised in the last column.

| Symbol         | NCBI gene ID | Gene_Name                                                                     | expression ratio<br>BJEL/BJ | expression ratio<br>BJELM/BJ | Co-expression<br>path |
|----------------|--------------|-------------------------------------------------------------------------------|-----------------------------|------------------------------|-----------------------|
| <i>DDX58</i>   | 23586        | DEAD (Asp-Glu-Ala-Asp) box polypeptide 58                                     | 11,19                       | 0,57                         | 2                     |
| <i>TRIM21</i>  | 6737         | tripartite motif containing 21                                                | 2,48                        | 0,56                         | neutral               |
| <i>SP100</i>   | 6672         | SP100 nuclear antigen                                                         | 2,64                        | 0,66                         | neutral               |
| <i>NLRC5</i>   | 84166        | NLR family, CARD domain containing 5                                          | 1,65                        | 0,98                         | neutral               |
| <i>SP110</i>   | 3431         | SP110 nuclear body protein                                                    | 4,47                        | 0,63                         | 2                     |
| <i>IRF1</i>    | 3659         | interferon regulatory factor 1                                                | 1,83                        | 0,95                         | neutral               |
| <i>IFI16</i>   | 3428         | interferon, gamma-inducible protein 16                                        | 1,55                        | 0,72                         | neutral               |
| <i>STAT1</i>   | 6772         | signal transducer and activator of transcription 1, 91kDa                     | 2,31                        | 0,33                         | 3                     |
| <i>STAT6</i>   | 6778         | signal transducer and activator of transcription 6, interleukin-4 induced     | 0,76                        | 0,64                         | neutral               |
| <i>IRF7</i>    | 3665         | interferon regulatory factor 7                                                | 1,94                        | 0,80                         | neutral               |
| <i>ZFP82</i>   | 284406       | ZFP82 zinc finger protein                                                     | 1,58                        | 1,32                         | neutral               |
| <i>ZNF876P</i> | 642280       | zinc finger protein 876, pseudogene                                           | 2,24                        | 1,04                         | 2                     |
| <i>RBCK1</i>   | 10616        | RanBP-type and C3HC4-type zinc finger containing 1                            | 1,08                        | 0,57                         | neutral               |
| <i>IRF2</i>    | 3660         | interferon regulatory factor 2                                                | 1,54                        | 0,53                         | neutral               |
| <i>KDM5C</i>   | 8242         | lysine (K)-specific demethylase 5C                                            | 1,10                        | 0,98                         | neutral               |
| <i>FOXH1</i>   | 8928         | forkhead box H1                                                               | 0,98                        | 0,97                         | neutral               |
| <i>ELF4</i>    | 2000         | E74-like factor 4 (ets domain transcription factor)                           | 1,30                        | 0,81                         | neutral               |
| <i>HCLS1</i>   | 3059         | hematopoietic cell-specific Lyn substrate 1                                   | 1,26                        | 1,17                         | neutral               |
| <i>RUNX3</i>   | 864          | runx-related transcription factor 3                                           | 0,98                        | 1,20                         | neutral               |
| <i>FLI1</i>    | 2313         | Fli-1 proto-oncogene, ETS transcription factor                                | 0,99                        | 0,44                         | 5                     |
| <i>TEAD4</i>   | 7004         | TEA domain family member 4                                                    | 1,43                        | 2,41                         | 4                     |
| <i>IRF6</i>    | 3664         | interferon regulatory factor 6                                                | 0,81                        | 0,85                         | neutral               |
| <i>NFIA</i>    | 4774         | nuclear factor I/A                                                            | 0,84                        | 2,55                         | 4                     |
| <i>SATB2</i>   | 23314        | SATB homeobox 2                                                               | 0,88                        | 0,73                         | neutral               |
| <i>SMAD7</i>   | 4092         | SMAD family member 7                                                          | 0,46                        | 0,55                         | 6                     |
| <i>STAT2</i>   | 6773         | signal transducer and activator of transcription 2, 113kDa                    | 1,77                        | 0,24                         | 5                     |
| <i>TEAD1</i>   | 7003         | TEA domain family member 1 (SV40 transcriptional enhancer factor)             | 0,78                        | 0,61                         | neutral               |
| <i>PRDM1</i>   | 639          | PR domain containing 1, with ZNF domain                                       | 0,41                        | 0,34                         | 7                     |
| <i>TBX5</i>    | 6910         | T-box 5                                                                       | 0,55                        | 0,57                         | neutral               |
| <i>TEAD3</i>   | 7005         | TEA domain family member 3                                                    | 0,66                        | 0,51                         | neutral               |
| <i>MYOCD</i>   | 93649        | myocardin                                                                     | 0,18                        | 0,10                         | 7                     |
| <i>SOX7</i>    | 83595        | SRY (sex determining region Y)-box 7                                          | 0,90                        | 0,97                         | neutral               |
| <i>HIC1</i>    | 3090         | hypermethylated in cancer 1                                                   | 0,82                        | 0,84                         | neutral               |
| <i>TBX2</i>    | 6909         | T-box 2                                                                       | 0,69                        | 0,69                         | neutral               |
| <i>FOXF2</i>   | 2295         | forkhead box F2                                                               | 0,65                        | 0,60                         | neutral               |
| <i>OSR2</i>    | 116039       | odd-skipped related transcription factor 2                                    | 0,44                        | 0,27                         | 7                     |
| <i>TBX3</i>    | 6926         | T-box 3                                                                       | 0,70                        | 0,78                         | neutral               |
| <i>SNAI2</i>   | 6591         | snail family zinc finger 2                                                    | 0,86                        | 0,65                         | neutral               |
| <i>YAP1</i>    | 10413        | Yes-associated protein 1                                                      | 0,87                        | 0,76                         | neutral               |
| <i>LMO4</i>    | 8543         | LIM domain only 4                                                             | 0,94                        | 0,71                         | neutral               |
| <i>AFF3</i>    | 3899         | AF4/FMR2 family, member 3                                                     | 0,83                        | 0,60                         | neutral               |
| <i>GATA6</i>   | 2627         | GATA binding protein 6                                                        | 1,16                        | 1,42                         | neutral               |
| <i>TFAP2C</i>  | 7022         | transcription factor AP-2 gamma (activating enhancer binding protein 2 gamma) | 1,15                        | 0,26                         | 5                     |

| Symbol         | NCBI gene ID | Gene_Name                                                                                         | expression ratio<br>BJEL/BJ | expression ratio<br>BJELM/BJ | Co-expression<br>path |
|----------------|--------------|---------------------------------------------------------------------------------------------------|-----------------------------|------------------------------|-----------------------|
| <i>TBX18</i>   | 9096         | T-box 18                                                                                          | 1,25                        | 0,90                         | neutral               |
| <i>TRPS1</i>   | 7227         | trichorhinophalangeal syndrome I                                                                  | 0,61                        | 0,72                         | neutral               |
| <i>HOXA5</i>   | 3202         | homeobox A5                                                                                       | 1,33                        | 0,99                         | neutral               |
| <i>LHX9</i>    | 56956        | LIM homeobox 9                                                                                    | 0,85                        | 0,25                         | 5                     |
| <i>SMARCA1</i> | 6594         | SWI/SNF related, matrix associated, actin dependent regulator of chromatin, subfamily a, member 1 | 1,00                        | 0,57                         | neutral               |
| <i>TSHZ3</i>   | 57616        | teashirt zinc finger homeobox 3                                                                   | 0,75                        | 0,37                         | 5                     |
| <i>NDN</i>     | 4692         | neccdin, melanoma antigen (MAGE) family member                                                    | 0,87                        | 0,69                         | neutral               |
| <i>NR2F2</i>   | 7026         | nuclear receptor subfamily 2, group F, member 2                                                   | 1,24                        | 1,25                         | neutral               |
| <i>HOXC6</i>   | 3223         | homeobox C6                                                                                       | 1,38                        | 0,74                         | neutral               |
| <i>NFIB</i>    | 4781         | nuclear factor I/B                                                                                | 9,92                        | 5,52                         | 1                     |
| <i>GLIS3</i>   | 169792       | GLIS family zinc finger 3                                                                         | 0,96                        | 1,12                         | neutral               |
| <i>HOXA13</i>  | 3209         | homeobox A13                                                                                      | 0,61                        | 0,69                         | neutral               |
| <i>JDP2</i>    | 122953       | Jun dimerization protein 2                                                                        | 0,80                        | 0,49                         | neutral               |
| <i>AEBP1</i>   | 165          | AE binding protein 1                                                                              | 0,40                        | 0,21                         | 7                     |
| <i>KLF2</i>    | 10365        | Kruppel-like factor 2                                                                             | 0,82                        | 0,72                         | neutral               |
| <i>KLF4</i>    | 9314         | Kruppel-like factor 4 (gut)                                                                       | 1,12                        | 0,90                         | neutral               |
| <i>ARID5B</i>  | 84159        | AT rich interactive domain 5B (MRF1-like)                                                         | 0,68                        | 0,35                         | 5                     |
| <i>GLIS2</i>   | 84662        | GLIS family zinc finger 2                                                                         | 0,65                        | 0,53                         | neutral               |
| <i>FOXC2</i>   | 2303         | forkhead box C2 (MFH-1, mesenchyme forkhead 1)                                                    | 0,82                        | 0,79                         | neutral               |
| <i>FOXD1</i>   | 2297         | forkhead box D1                                                                                   | 1,37                        | 1,50                         | neutral               |
| <i>MSX1</i>    | 4487         | msh homeobox 1                                                                                    | 0,85                        | 0,87                         | neutral               |
| <i>FOXC1</i>   | 2296         | forkhead box C1                                                                                   | 0,80                        | 0,89                         | neutral               |
| <i>TWIST1</i>  | 7291         | twist family bHLH transcription factor 1                                                          | 1,06                        | 0,77                         | neutral               |
| <i>WNT5A</i>   | 7474         | wingless-type MMTV integration site family, member 5A                                             | 0,33                        | 0,23                         | 7                     |
| <i>GLI2</i>    | 2736         | GLI family zinc finger 2                                                                          | 0,75                        | 0,65                         | neutral               |
| <i>CHD7</i>    | 55636        | chromodomain helicase DNA binding protein 7                                                       | 1,92                        | 2,91                         | 4                     |
| <i>DNMT3A</i>  | 1788         | DNA (cytosine-5-)-methyltransferase 3 alpha                                                       | 1,02                        | 0,93                         | neutral               |
| <i>JUN</i>     | 3725         | jun proto-oncogene                                                                                | 1,63                        | 1,52                         | neutral               |
| <i>SCML1</i>   | 6322         | sex comb on midleg-like 1 (Drosophila)                                                            | 2,29                        | 1,82                         | 2                     |
| <i>E2F2</i>    | 1870         | E2F transcription factor 2                                                                        | 1,44                        | 1,04                         | neutral               |
| <i>GF11B</i>   | 8328         | growth factor independent 1B transcription repressor                                              | 0,93                        | 0,97                         | neutral               |
| <i>KLF9</i>    | 687          | Kruppel-like factor 9                                                                             | 0,53                        | 0,62                         | neutral               |
| <i>TNFAIP3</i> | 7128         | tumor necrosis factor, alpha-induced protein 3                                                    | 0,86                        | 0,59                         | neutral               |
| <i>IRF9</i>    | 10379        | interferon regulatory factor 9                                                                    | 2,05                        | 0,30                         | neutral               |
| <i>ZBTB38</i>  | 253461       | zinc finger and BTB domain containing 38                                                          | 1,06                        | 1,08                         | neutral               |
| <i>SET</i>     | 6418         | SET nuclear oncogene                                                                              | 1,20                        | 1,47                         | neutral               |
| <i>ZNF649</i>  | 65251        | zinc finger protein 649                                                                           | 1,55                        | 1,78                         | neutral               |
| <i>TFB1M</i>   | 51106        | transcription factor B1, mitochondrial                                                            | 1,14                        | 1,91                         | neutral               |
| <i>APEX1</i>   | 328          | APEX nuclease (multifunctional DNA repair enzyme) 1                                               | 1,14                        | 1,39                         | neutral               |
| <i>RFC1</i>    | 5981         | replication factor C (activator 1) 1, 145kDa                                                      | 1,82                        | 1,98                         | neutral               |
| <i>ZNF146</i>  | 7705         | zinc finger protein 146                                                                           | 1,19                        | 1,44                         | neutral               |
| <i>DDX1</i>    | 1653         | DEAD (Asp-Glu-Ala-Asp) box helicase 1                                                             | 0,96                        | 1,18                         | neutral               |
| <i>ILF2</i>    | 3608         | interleukin enhancer binding factor 2                                                             | 1,32                        | 1,32                         | neutral               |
| <i>ZNF473</i>  | 25888        | zinc finger protein 473                                                                           | 2,34                        | 2,74                         | 1                     |
| <i>HNRNPAB</i> | 3182         | heterogeneous nuclear ribonucleoprotein A/B                                                       | 1,31                        | 1,67                         | neutral               |
| <i>RUVBL2</i>  | 10856        | RuvB-like AAA ATPase 2                                                                            | 1,52                        | 2,25                         | 4                     |

| Symbol          | NCBI gene ID | Gene_Name                                                                                                       | expression ratio<br>BJEL/BJ | expression ratio<br>BJELM/BJ | Co-expression<br>path |
|-----------------|--------------|-----------------------------------------------------------------------------------------------------------------|-----------------------------|------------------------------|-----------------------|
| <i>ZNF114</i>   | 163071       | zinc finger protein 114                                                                                         | 1,52                        | 1,13                         | neutral               |
| <i>TET1</i>     | 80312        | tet methylcytosine dioxygenase 1                                                                                | 0,80                        | 1,02                         | neutral               |
| <i>ZIK1</i>     | 284307       | zinc finger protein interacting with K protein 1                                                                | 2,48                        | 1,31                         | 2                     |
| <i>HMGB2</i>    | 3148         | high mobility group box 2                                                                                       | 2,10                        | 2,24                         | neutral               |
| <i>PURA</i>     | 5813         | purine-rich element binding protein A                                                                           | 0,92                        | 0,87                         | neutral               |
| <i>ZNF641</i>   | 121274       | zinc finger protein 641                                                                                         | 0,74                        | 0,42                         | neutral               |
| <i>ZNF93</i>    | 81931        | zinc finger protein 93                                                                                          | 4,45                        | 2,34                         | 1                     |
| <i>BRIP1</i>    | 83990        | BRCA1 interacting protein C-terminal helicase 1                                                                 | 2,71                        | 2,68                         | neutral               |
| <i>TOP2A</i>    | 7153         | topoisomerase (DNA) II alpha 170kDa                                                                             | 1,78                        | 1,88                         | neutral               |
| <i>E2F1</i>     | 1869         | E2F transcription factor 1                                                                                      | 1,92                        | 1,80                         | neutral               |
| <i>FOXM1</i>    | 2305         | forkhead box M1                                                                                                 | 1,62                        | 1,64                         | neutral               |
| <i>SMARCC1</i>  | 6599         | SWI/SNF related, matrix associated, actin dependent regulator of chromatin, subfamily c, member 1               | 1,23                        | 1,64                         | neutral               |
| <i>BLM</i>      | 641          | Bloom syndrome, RecQ helicase-like                                                                              | 3,50                        | 6,36                         | 1                     |
| <i>BRCA1</i>    | 672          | breast cancer 1, early onset                                                                                    | 3,57                        | 4,95                         | 1                     |
| <i>ZNF85</i>    | 7639         | zinc finger protein 85                                                                                          | 2,40                        | 1,58                         | 2                     |
| <i>ORC1</i>     | 4998         | origin recognition complex, subunit 1                                                                           | 3,83                        | 4,44                         | neutral               |
| <i>PCNA</i>     | 5111         | proliferating cell nuclear antigen                                                                              | 1,69                        | 1,96                         | neutral               |
| <i>WHSC1</i>    | 7468         | Wolf-Hirschhorn syndrome candidate 1                                                                            | 1,76                        | 1,78                         | neutral               |
| <i>UHRF1</i>    | 29128        | ubiquitin-like with PHD and ring finger domains 1                                                               | 1,98                        | 2,78                         | 4                     |
| <i>TMPO</i>     | 7112         | thymopoietin                                                                                                    | 2,23                        | 2,44                         | neutral               |
| <i>ZNF215</i>   | 7762         | zinc finger protein 215                                                                                         | 1,46                        | 1,55                         | neutral               |
| <i>MYBL2</i>    | 4605         | v-myb avian myeloblastosis viral oncogene homolog-like 2                                                        | 2,94                        | 3,28                         | neutral               |
| <i>ZNF367</i>   | 195828       | zinc finger protein 367                                                                                         | 2,27                        | 1,71                         | neutral               |
| <i>BRCA2</i>    | 675          | breast cancer 2, early onset                                                                                    | 3,40                        | 4,19                         | 1                     |
| <i>PCGF6</i>    | 84108        | polycomb group ring finger 6                                                                                    | 1,69                        | 2,00                         | neutral               |
| <i>MCM8</i>     | 84515        | minichromosome maintenance complex component 8                                                                  | 2,31                        | 2,97                         | neutral               |
| <i>TFDP1</i>    | 7027         | transcription factor Dp-1                                                                                       | 1,35                        | 1,70                         | neutral               |
| <i>DEK</i>      | 7913         | DEK oncogene                                                                                                    | 1,63                        | 1,56                         | neutral               |
| <i>EZH2</i>     | 2146         | enhancer of zeste homolog 2 (Drosophila)                                                                        | 2,13                        | 2,08                         | neutral               |
| <i>HELLS</i>    | 3070         | helicase, lymphoid-specific                                                                                     | 2,81                        | 4,63                         | 1                     |
| <i>CDT1</i>     | 81620        | chromatin licensing and DNA replication factor 1                                                                | 2,40                        | 2,66                         | 1                     |
| <i>POLA1</i>    | 5422         | polymerase (DNA directed), alpha 1, catalytic subunit                                                           | 2,47                        | 3,24                         | 1                     |
| <i>SAP30</i>    | 8819         | Sin3A-associated protein, 30kDa                                                                                 | 1,01                        | 0,81                         | neutral               |
| <i>CRY2</i>     | 1408         | cryptochrome circadian clock 2                                                                                  | 0,93                        | 0,89                         | neutral               |
| <i>ZBTB20</i>   | 26137        | zinc finger and BTB domain containing 20                                                                        | 0,54                        | 0,35                         | 5                     |
| <i>DNMT3B</i>   | 1789         | DNA (cytosine-5-)-methyltransferase 3 beta                                                                      | 1,21                        | 1,32                         | neutral               |
| <i>HMGA2</i>    | 8091         | high mobility group AT-hook 2                                                                                   | 0,71                        | 0,71                         | neutral               |
| <i>ATXN1</i>    | 6310         | ataxin 1                                                                                                        | 0,55                        | 0,37                         | 5                     |
| <i>HMGA1</i>    | 3159         | high mobility group AT-hook 1                                                                                   | 0,90                        | 1,58                         | neutral               |
| <i>HDAC2</i>    | 3066         | histone deacetylase 2                                                                                           | 1,23                        | 1,27                         | neutral               |
| <i>TRIM24</i>   | 8805         | tripartite motif containing 24                                                                                  | 1,16                        | 1,43                         | neutral               |
| <i>TADA2B</i>   | 93624        | transcriptional adaptor 2B                                                                                      | 0,96                        | 0,77                         | neutral               |
| <i>CREBRF</i>   | 153222       | CREB3 regulatory factor                                                                                         | 0,61                        | 0,31                         | 5                     |
| <i>SMARCAD1</i> | 56916        | SWI/SNF-related, matrix-associated actin-dependent regulator of chromatin, subfamily a, containing DEAD/H box 1 | 1,23                        | 1,47                         | neutral               |

| <b>Symbol</b> | <b>NCBI gene ID</b> | <b>Gene_Name</b>                                                                | <b>expression ratio<br/>BJEL/BJ</b> | <b>expression ratio<br/>BJELM/BJ</b> | <b>Co-expression<br/>path</b> |
|---------------|---------------------|---------------------------------------------------------------------------------|-------------------------------------|--------------------------------------|-------------------------------|
| <i>NONO</i>   | 4841                | non-POU domain containing, octamer-binding                                      | 1,23                                | 1,33                                 | neutral                       |
| <i>TTF2</i>   | 8458                | transcription termination factor, RNA polymerase II                             | 1,86                                | 2,27                                 | neutral                       |
| <i>SSRP1</i>  | 6749                | structure specific recognition protein 1                                        | 1,73                                | 2,65                                 | 4                             |
| <i>MYC</i>    | 4609                | v-myc avian myelocytomatosis viral oncogene homolog                             | 1,55                                | 0,82                                 | 4                             |
| <i>MTERF3</i> | 51001               | Mitochondrial Transcription Termination Factor 3                                | 1,85                                | 2,26                                 | 4                             |
| <i>ZBTB9</i>  | 221504              | zinc finger and BTB domain containing 9                                         | 1,39                                | 1,55                                 | neutral                       |
| <i>TAF9</i>   | 6880                | TAF9 RNA polymerase II, TATA box binding protein (TBP)-associated factor, 32kDa | 1,33                                | 1,58                                 | neutral                       |
| <i>DHX33</i>  | 56919               | DEAH (Asp-Glu-Ala-His) box polypeptide 33                                       | 1,70                                | 3,97                                 | 4                             |
| <i>NOLC1</i>  | 9221                | nucleolar and coiled-body phosphoprotein 1                                      | 1,98                                | 3,76                                 | neutral                       |
