# Supplementary material for: Reconstruction of gene regulatory networks reveals chromatin remodelers and key transcription factors in tumorigenesis
Source: PubMed Central journal article supplement (PMC4872343; doi:10.1186/s13073-016-0310-3), 2016-05-19
Supplement: 13073_2016_310_MOESM11_ESM.pdf [file 13073_2016_310_MOESM11_ESM.pdf]

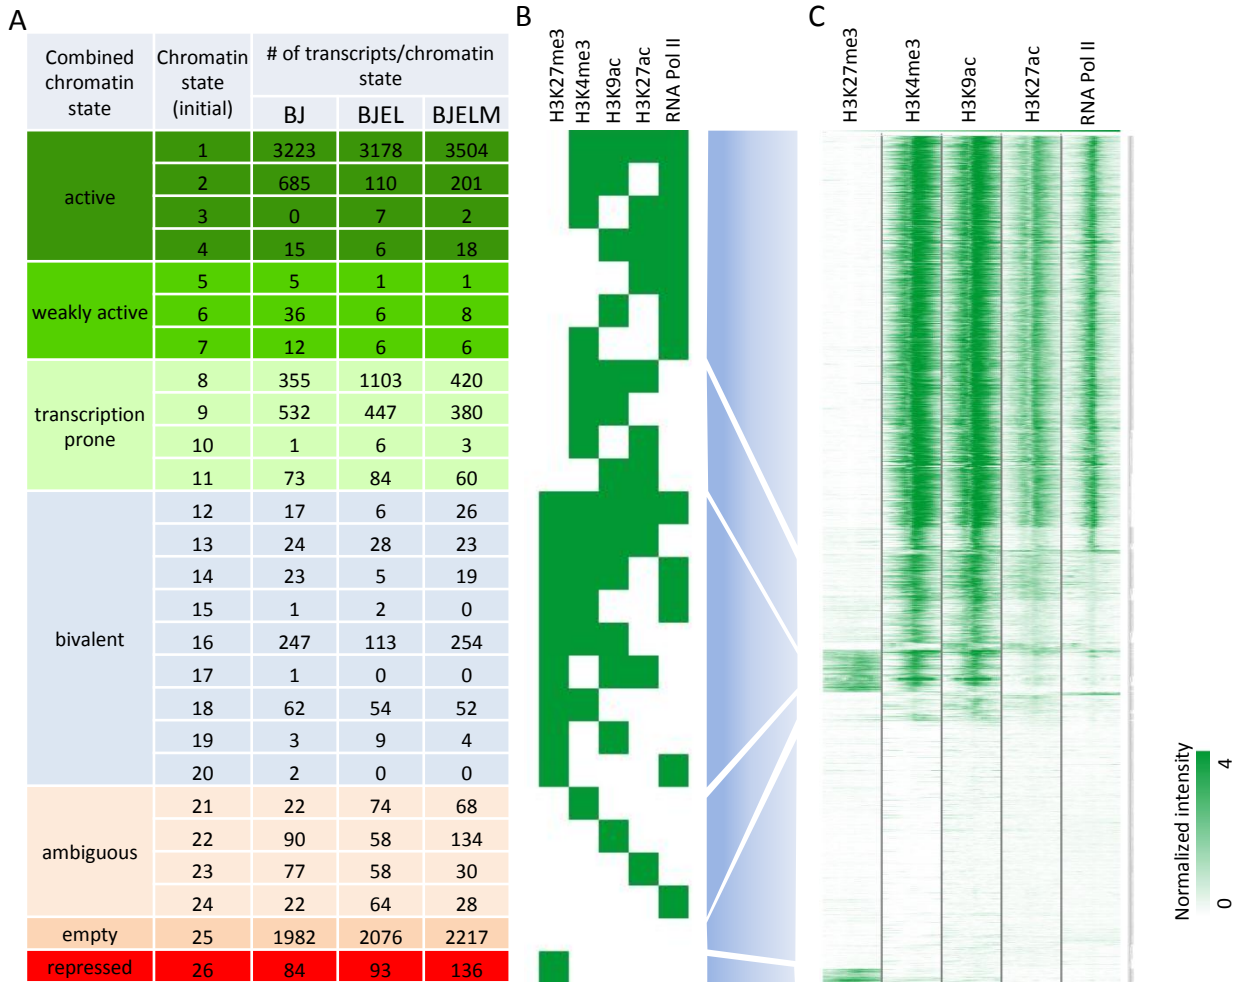

**Figure S7. Chromatin state annotation.** **a**, Statistical analysis of chromatin states (initial and combined) at the TSSs of DEGs. **b**, Chromatin state classification. Green box stands for the presence of epigenetic mark or polII at the TSSs  $\pm$  500bp, white – for the absence. **c**, Normalized ChIP signal intensities at the TSSs  $\pm$  500bp, ordered from 1<sup>st</sup> to 26<sup>th</sup> chromatin state as in (A) in BJ cells.
